# Supplementary material
Source: PubMed Central journal article supplement (PMC9923553)
Supplement: PEDS_20153813SupplementaryData.pdf [file PEDS_20153813SupplementaryData.pdf]

## Supplemental Information

**SUPPLEMENTAL TABLE 4** Sociodemographic Characteristics of Patients Enrolled and Not Enrolled in PCMHs After Propensity Score Matching

|                                  | Enrolled | Not Enrolled | <i>P</i> |
|----------------------------------|----------|--------------|----------|
| Gender, female                   | 52.5     | 55.3         | .454     |
| Age, y, mean                     | 19.9     | 19.8         | .766     |
| Race                             |          |              |          |
| Hispanic/Latino                  | 52.2     | 50.6         | .654     |
| Non-Hispanic black               | 28.8     | 28.8         | 1.0      |
| Other                            | 19.8     | 20.6         | .557     |
| Country of birth, United States  | 82.4     | 81.6         | .771     |
| Primary language, English        | 77.4     | 78.8         | .652     |
| Marital status, single           | 97.2     | 97.2         | 1.0      |
| Employment status, student       | 49.2     | 48.9         | .941     |
| Health insurance status, insured | 85.8     | 88.0         | .377     |

Values are percentages unless otherwise noted.
